# Supplementary material for: The value of synthetic magnetic resonance imaging in the diagnosis and assessment of prostate cancer aggressiveness
Source: PubMed Central journal article supplement — Quant Imaging Med Surg. 2024 Jul 9;14(8):5473–89. doi: 10.21037/qims-24-291 (PMC11320532; doi:10.21037/qims-24-291), 2024-07-09
Supplement: qims-14-08-5473-supplementary.pdf [file qims-14-08-5473-supplementary.pdf]

**Tables S1** MRI parameters

| Parameters                    | T1WI           | T2WI                      | DWI                | Synthetic MRI       |
|-------------------------------|----------------|---------------------------|--------------------|---------------------|
| Sequence                      | Fast spin echo | Fast spin echo            | Echo planar        | QRAPMASTER          |
| Imaging plane                 | Axial          | Axial, coronal, sagittal  | Axial              | Axial               |
| Repetition time (msec)        | 836            | 6,401, 7,490, 4,861       | 4,533              | 4,000               |
| Echo time (msec)              | 7              | 88, 92, 102               | 80                 | 21.2/95.3           |
| Inversion time (msec)         | NA             | NA                        | 120                | 170/670/1,840/3,840 |
| Flip angle (degrees)          | 111            | 111, 111, 111             | 90                 | 90                  |
| Slice thickness/gap (mm)      | 3/0            | 2/0, 3/0, 3/0             | 3.6/0              | 4/0.5               |
| Field of view (mm)            | 340×340        | 260×260, 240×240, 240×240 | 260×260            | 340×340             |
| Matrix (frequency × phase)    | 352×288        | 384×288, 352×288, 332×256 | 96×96              | 388×224             |
| Number of excitations         | 2              | 4, 4, 3                   | 12                 | 1                   |
| Echo train length             | 3              | 15, 19, 16                | NA                 | 12                  |
| Bandwidth (kHz)               | 83.33          | 41.67, 35.71, 31.25       | 250                | 22.73               |
| b-values (s/mm <sup>2</sup> ) | NA             | NA                        | 50/800/1,400/2,000 | NA                  |
| Acceleration factor           | 2              | 2                         | 2                  | 2                   |
| Acquisition time (min:s)      | 01:25          | 04:23, 04:07, 02:31       | 05:31              | 05:04               |

MRI, magnetic resonance imaging; T1WI, T1 weighted image; T2WI, T2 weighted image; DWI, diffusion weighted imaging; QRAPMASTER, quantification of relaxation times and proton density by multiecho acquisition of a saturation-recovery using turbo spin-echo readout; NA, not applicable.

**Tables S2** Interobserver agreement

| Parameter                                  | Intraclass correlation coefficient | P      |
|--------------------------------------------|------------------------------------|--------|
| T1 (msec)                                  | 0.988 (0.986–0.991)                | <0.001 |
| T2 (msec)                                  | 0.987 (0.984–0.990)                | <0.001 |
| PD (pu)                                    | 0.871 (0.839–0.897)                | <0.001 |
| ADC (×10 <sup>-6</sup> mm <sup>2</sup> /s) | 0.979 (0.973–0.983)                | <0.001 |

Values in parentheses are the 95% CI. PD, proton density; ADC, apparent diffusion coefficient; CI, confidence interval.
